# Supplementary material for: Potential Circulating Biomarkers of Recurrence after Hepatic Resection or Liver Transplantation in Hepatocellular Carcinoma Patients
Source: PubMed Central journal article supplement (PMC7281651; doi:10.3390/cancers12051275), 2020-05-18
Supplement: cancers-12-01275-s001.pdf [file cancers-12-01275-s001.pdf]

## Supplementary Figure Legend

**Fig. S1. Analysis of downstream effectors of IL-10 pathway using The Cancer Genome Atlas (TCGA) data.** **A**, As expected, expression of *IL10RA*, *JAK1*, *IL10RB*, *JAK1* and *TYK2* clustered in the analyzed tumor samples. **B**, Significant correlation between *IL10RA* and *JAK1* expression in HCC tissues. **C**, Using a threshold of  $>2$  z-score for mRNA expression for both *IL10RA* and *JAK1*, we found that tumors with high levels of *IL10RA* or *JAK1* had a median overall-survival of 37.29 months, compared to control tumors (58.84 months,  $P = 0.0210$ , Chi square).

**A**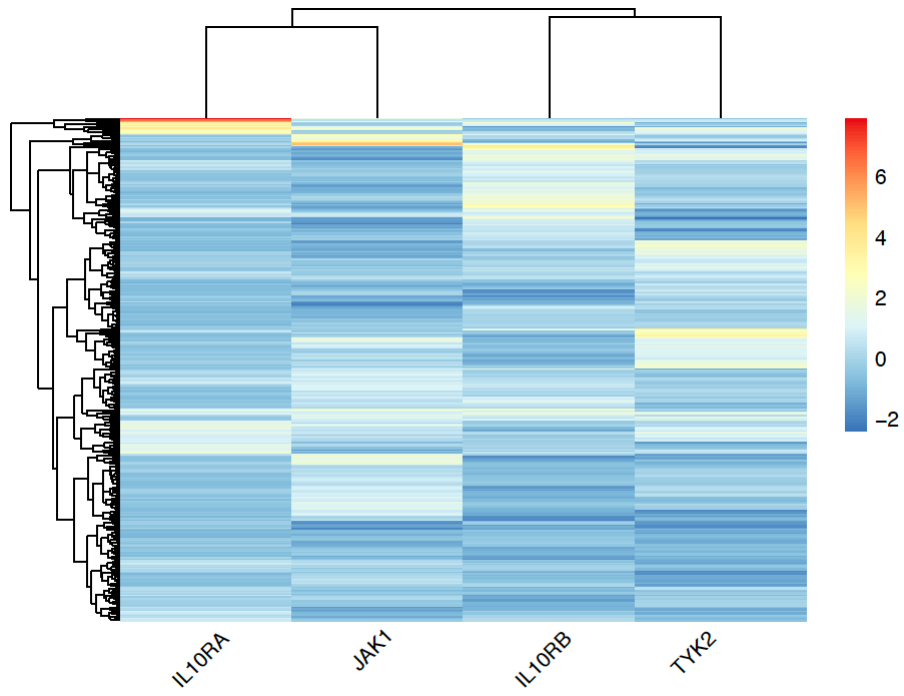**B**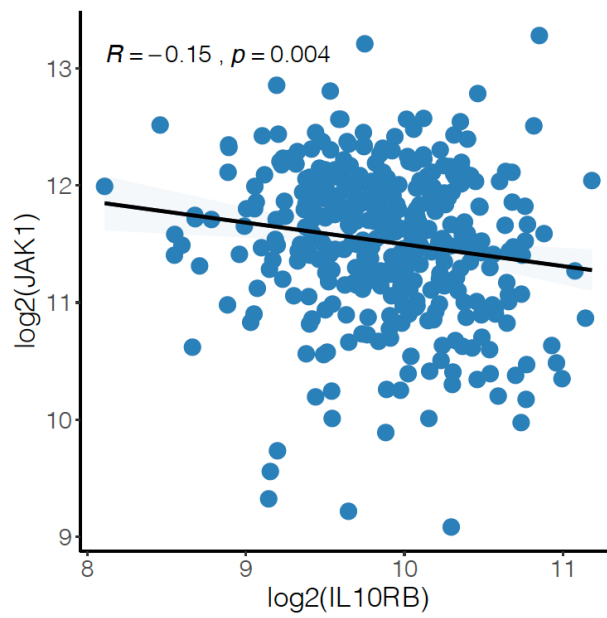**C**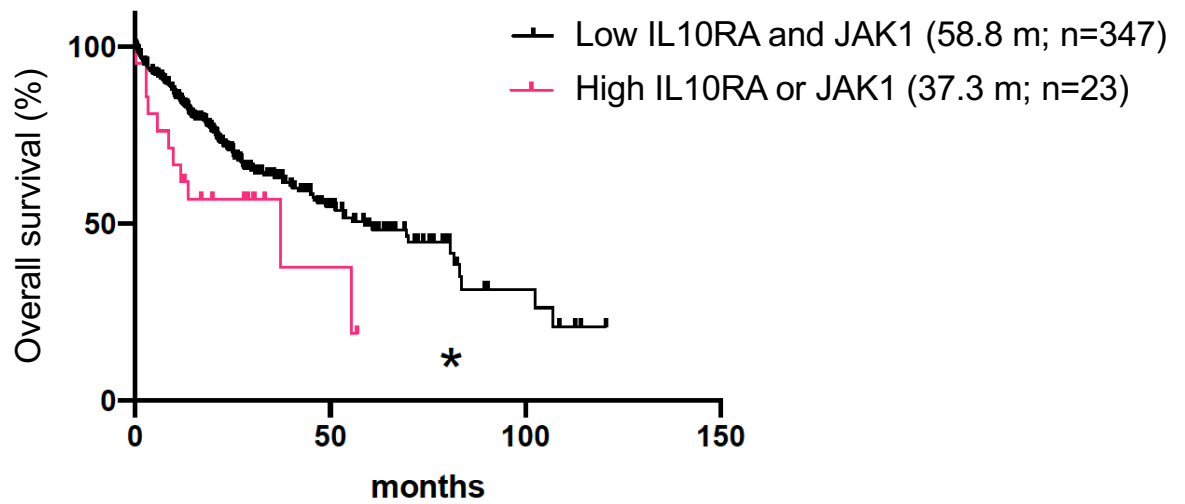

**Supplementary Table S1: Comparison of preoperative plasma versus serum biomarkers in patients undergoing liver resection.** Data are shown as median values and interquartile ranges, with p values from the exact Wilcoxon/exact Fisher test.

| <b>Biomarker</b>                       | <b>Plasma (n)</b>     | <b>Serum (n)</b>      | <b>p-value</b> |
|----------------------------------------|-----------------------|-----------------------|----------------|
| <b>IFN-<math>\gamma</math> (pg/ml)</b> | 7.5 [5.6,12.8] (45)   | 9.2 [5.2,14.3] (69)   | 0.56           |
| <b>IL-6 (pg/ml)</b>                    | 1.60 [1.60,4.31] (45) | 2.27 [1.60,5.06] (69) | 0.24           |
| <b>IL-8 (pg/ml)</b>                    | 12.8 [7.3,18.5] (45)  | 31.3 [22.1,57.1] (69) | <0.0001        |
| <b>IL-10 (pg/ml)</b>                   | 0.77 [0.57,1.99] (45) | 0.91 [0.63,1.50] (69) | 0.57           |
| <b>TNF-<math>\alpha</math> (pg/ml)</b> | 3.4 [2.7,4.1] (45)    | 3.7 [2.7,4.7] (69)    | 0.43           |
| <b>bFGF (pg/ml)</b>                    | 3.8 [2.5,8.5] (45)    | 6.7 [3.0,19.6] (69)   | 0.027          |
| <b>PIGF (pg/ml)</b>                    | 34.5 [25.3,42.9] (45) | 35.9 [29.3,43.1] (69) | 0.48           |
| <b>sVEGFR1-1 (pg/ml)</b>               | 115 [86,217] (45)     | 95 [76,114] (69)      | 0.013          |
| <b>sTIE2 (pg/ml)</b>                   | 5386 [4618,7415] (45) | 4602 [3580,5956] (69) | 0.0089         |
| <b>VEGF (pg/ml)</b>                    | 84 [42,148] (45)      | 502 [223,1014] (69)   | <0.0001        |
| <b>VEGF-C (pg/ml)</b>                  | 98 [89,193] (45)      | 515 [267,747] (69)    | <0.0001        |
| <b>VEGF-D (pg/ml)</b>                  | 696 [542,986] (45)    | 1156 [933,1662] (69)  | <0.0001        |
| <b>AFP (ng/ml)</b>                     | 12.5 [5.6,20.0] (32)  | 13.5 [3.7,20.0] (69)  | 0.77           |

AFP, alphafetoprotein; bFGF, basic fibroblast growth factor; IFN, interferon; IL, interleukin; LR liver resection; LT, liver transplantation; PIGF, placental growth factor; sTIE2, soluble angiopoietin receptor; VEGF, vascular endothelial growth factor; VEGFR, VEGF receptor; TNF, tumor necrosis factor.

**Supplementary Table S2. Analysis of clinical parameters and circulating biomarker of interest stratified by Milan criteria in HCC patients undergoing liver transplantation.**

| <b>Biomarkers</b>                      | <b>Within Milan Criteria</b> | <b>Outside Milan Criteria</b> | <b>P-value</b> |
|----------------------------------------|------------------------------|-------------------------------|----------------|
| <b>Number of deaths</b>                | 11/34 pts (32.4%)            | 5/13 pts (38.5%)              | 0.74           |
| <b>Number of deaths or recurrences</b> | 11/34 pts (32.4%)            | 6/13 pts (46.2%)              | 0.50           |
| <b>AFP (&gt;20 ng/ml)</b>              | 12/34 pts (35.3%)            | 2/13 pts (15.4%)              | 0.29           |
| <b>AFP truncated at 20 ng/ml</b>       | 8.1 [3.5, 20.0] (n=34)       | 7.8 [3.3, 9.2] (n=13)         | 0.49           |
| <b>VEGF (pg/ml)</b>                    | 80.3 [40.4, 248.6] (n=34)    | 106.5 [40.0, 210.9] (n=13)    | 0.95           |
| <b>VEGF-C (pg/ml)</b>                  | 138.6 [89.0, 180.2] (n=34)   | 121.1 [89.4, 144.0] (n=13)    | 0.65           |

AFP, alphafetoprotein; VEGF, vascular endothelial growth factor.
